# Supplementary material for: Cynaropicrin Potentiates the Anti-Tumor Effects of Paclitaxel and 5-Fluorouracil on KYSE30 Human Esophageal Carcinoma
Source: Research Square preprint supplement (doi:10.21203/rs.3.rs-816266/v1), 2021-08-19
Supplement: Supplementary file 1 [file c58dc03d6eb4efc24f1b9f0c.pdf]

# CompuSyn Report

**Experiment Name:** kh. nasirzadeh  
**Date:** 2017  
**File Name:** C:\Users\sng\Desktop\kh. nasirzadeh\analyzed\5-fuCin48h.cse  
**Description:** 5flurouracil + cinaropecrin on kyse30 cell line, after 48h treatment analyzed by N. Goftari  
**Drug:** 5-flurouracil (5-fu) [uM]  
**Drug:** cinaropecrin (cin) [uM]  
**Drug Combo:** 5-flurouracil + cinaropecrin (fu+cin) (5-fu+cin [4.438:1])

---

Data for Drug: 5-fu [uM]

| Dose   | Effect |
|--------|--------|
| 64.11  | 0.838  |
| 128.15 | 0.722  |
| 192.18 | 0.587  |
| 256.22 | 0.34   |
| 320.26 | 0.304  |

5 data points entered.

**X-int:** 2.30110

**Y-int:** 3.70663 +/- 0.50761

**m:** -1.6108 +/- 0.22700

**Dm:** 200.033

**r:** -0.9715

---

Data for Drug: cin [uM]

| Dose  | Effect |
|-------|--------|
| 14.43 | 0.969  |
| 28.87 | 0.72   |
| 43.3  | 0.482  |
| 57.74 | 0.399  |
| 72.17 | 0.367  |

5 data points entered.

**X-int:** 1.69059

**Y-int:** 4.27621 +/- 0.56751

**m:** -2.5294 +/- 0.35593

**Dm:** 49.0440

**r:** -0.9716

---

Data for Drug Combo: fu+cin (5-fu+cin [4.438:1])

| Dose A   | Effect |
|----------|--------|
| 64.1100+ | 0.262  |
| 128.150+ | 0.147  |
| 192.180+ | 0.077  |
| 256.220+ | 0.059  |
| 320.260+ | 0.023  |

5 data points entered.

**X-int:** 1.65579

**Y-int:** 2.59029 +/- 0.55814

**m:** -1.5644 +/- 0.24018

**Dm:** 45.2679

**r:** -0.9664

### Dose-Effect Curve

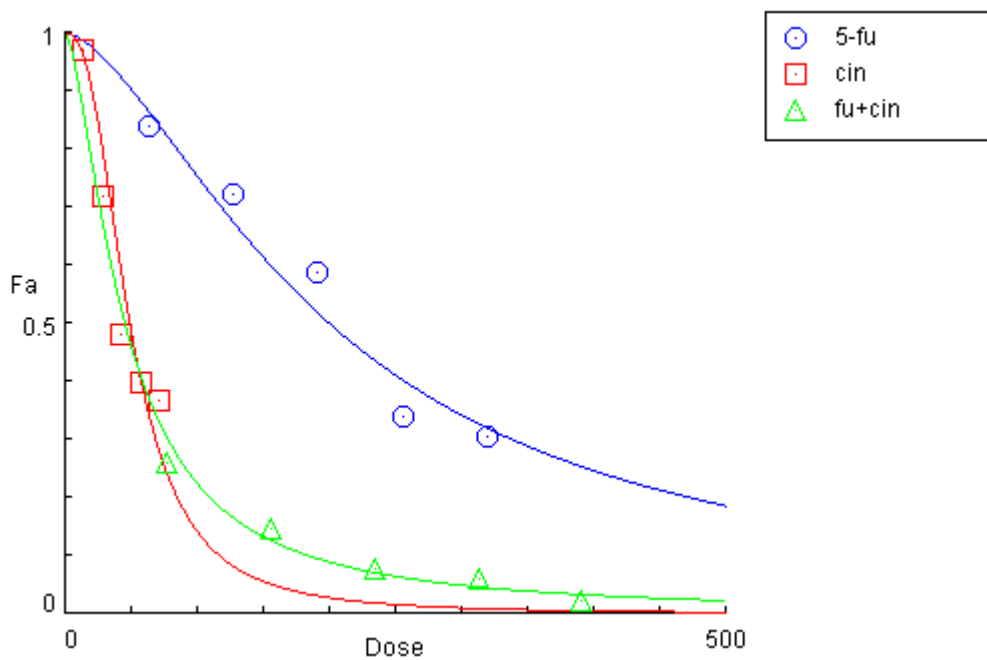

## Median-Effect Plot

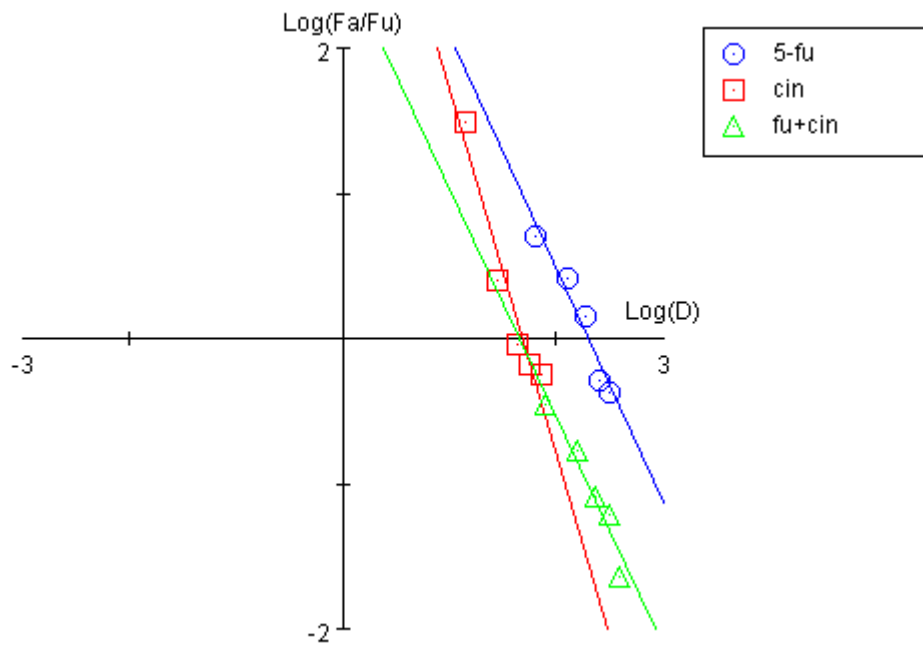

## CI Data for Drug Combo: fu+cin (5-fu+cin [4.438:1])

| Fa   | CI Value | Total Dose |
|------|----------|------------|
| 0.05 | 0.54302  | 297.309    |
| 0.1  | 0.48238  | 184.404    |
| 0.15 | 0.44980  | 137.195    |
| 0.2  | 0.42748  | 109.811    |
| 0.25 | 0.41035  | 91.3651    |
| 0.3  | 0.39629  | 77.8058    |
| 0.35 | 0.38420  | 67.2425    |
| 0.4  | 0.37345  | 58.6615    |
| 0.45 | 0.36362  | 51.4635    |
| 0.5  | 0.35442  | 45.2679    |
| 0.55 | 0.34563  | 39.8181    |
| 0.6  | 0.33706  | 34.9323    |
| 0.65 | 0.32854  | 30.4744    |
| 0.7  | 0.31987  | 26.3371    |
| 0.75 | 0.31082  | 22.4285    |
| 0.8  | 0.30107  | 18.6610    |
| 0.85 | 0.29006  | 14.9362    |
| 0.9  | 0.27668  | 11.1124    |
| 0.95 | 0.25771  | 6.89242    |
| 0.97 | 0.24594  | 4.90654    |

CI values for actual experimental points:

| Total Dose | Fa    | CI Value |
|------------|-------|----------|
| 78.5557    | 0.262 | 0.36409  |
| 157.026    | 0.147 | 0.50885  |
| 235.483    | 0.077 | 0.53629  |
| 313.953    | 0.059 | 0.62339  |
| 392.423    | 0.023 | 0.49040  |

Combination Index Plot

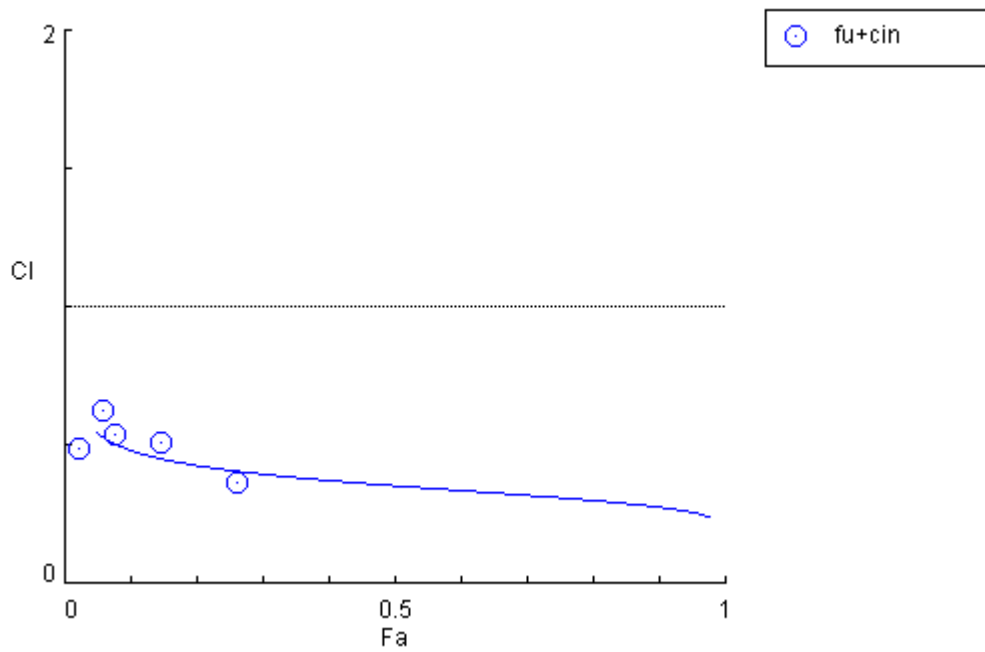

## Logarithmic Combination Index Plot

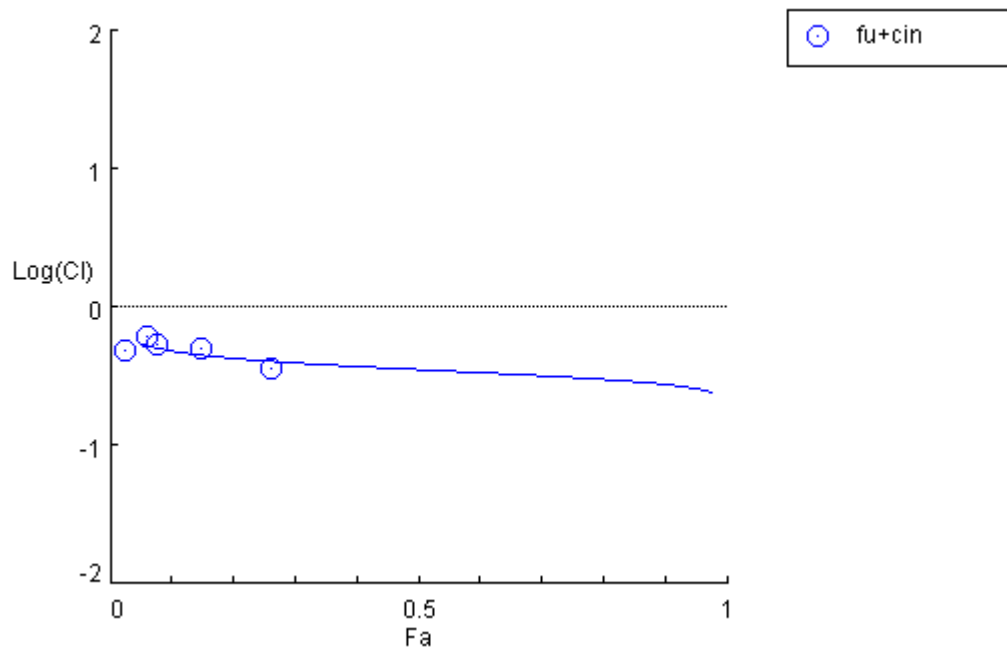

### DRI Data for Drug Combo: fu+cin (5-fu+cin [4.438:1])

| Fa   | Dose 5-fu | Dose cin | DRI 5-fu | DRI cin |
|------|-----------|----------|----------|---------|
| 0.05 | 1244.40   | 157.086  | 5.12865  | 2.87322 |
| 0.1  | 782.530   | 116.908  | 5.19975  | 3.44756 |
| 0.15 | 587.181   | 97.3670  | 5.24425  | 3.85932 |
| 0.2  | 473.003   | 84.8415  | 5.27802  | 4.20148 |
| 0.25 | 395.641   | 75.7207  | 5.30607  | 4.50685 |
| 0.3  | 338.488   | 68.5590  | 5.33069  | 4.79172 |
| 0.35 | 293.766   | 62.6431  | 5.35316  | 5.06604 |
| 0.4  | 257.288   | 57.5709  | 5.37426  | 5.33691 |
| 0.45 | 226.571   | 53.0934  | 5.39458  | 5.61023 |
| 0.5  | 200.033   | 49.0440  | 5.41456  | 5.89163 |
| 0.55 | 176.603   | 45.3035  | 5.43462  | 6.18714 |
| 0.6  | 155.519   | 41.7800  | 5.45516  | 6.50401 |
| 0.65 | 136.207   | 38.3971  | 5.47667  | 6.85176 |
| 0.7  | 118.211   | 35.0839  | 5.49975  | 7.24401 |
| 0.75 | 101.135   | 31.7656  | 5.52527  | 7.70189 |
| 0.8  | 84.5938   | 28.3507  | 5.55464  | 8.26167 |
| 0.85 | 68.1445   | 24.7036  | 5.59040  | 8.99414 |
| 0.9  | 51.1330   | 20.5745  | 5.63825  | 10.0684 |
| 0.95 | 32.1546   | 15.3121  | 5.71641  | 12.0810 |
| 0.97 | 23.1154   | 12.4094  | 5.77268  | 13.7535 |

DRI values calculated at experimental points

| <b>Fa</b> | <b>Dose 5-fu</b> | <b>Dose cin</b> | <b>DRI 5-fu</b> | <b>DRI cin</b> |
|-----------|------------------|-----------------|-----------------|----------------|
| 0.262     | 380.463          | 73.8576         | 5.93453         | 5.11278        |
| 0.147     | 595.893          | 98.2846         | 4.64996         | 3.40371        |
| 0.077     | 934.914          | 130.934         | 4.86479         | 3.02364        |
| 0.059     | 1116.27          | 146.583         | 4.35668         | 2.53898        |
| 0.023     | 2050.58          | 215.912         | 6.40287         | 2.99200        |

---

DRI Plot for Combo: fu+cin (5-fu+cin [4.438:1])

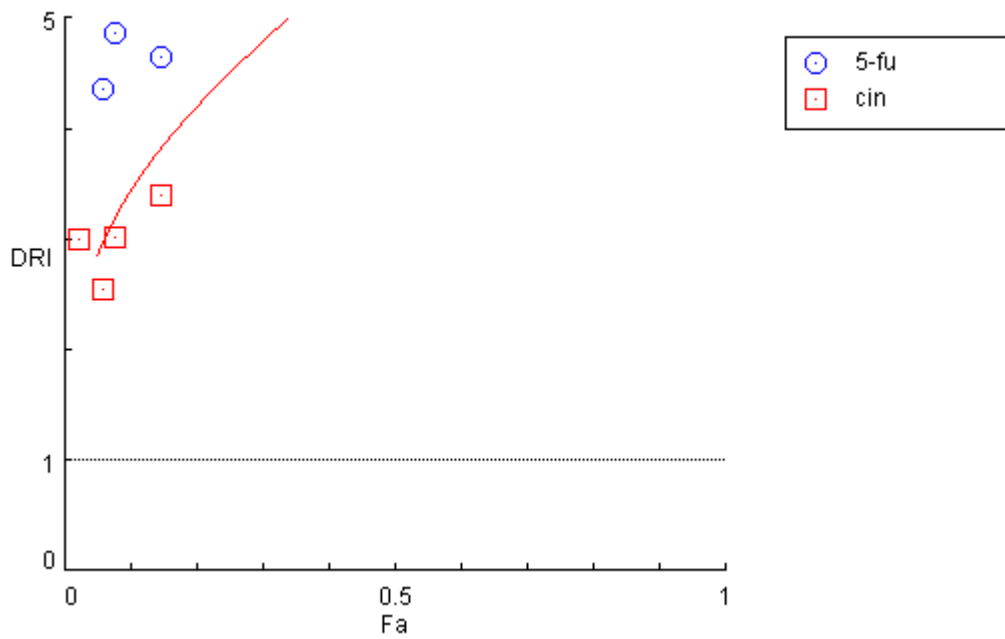

Log(DRI) Plot for Combo: fu+cin (5-fu+cin [4.438:1])

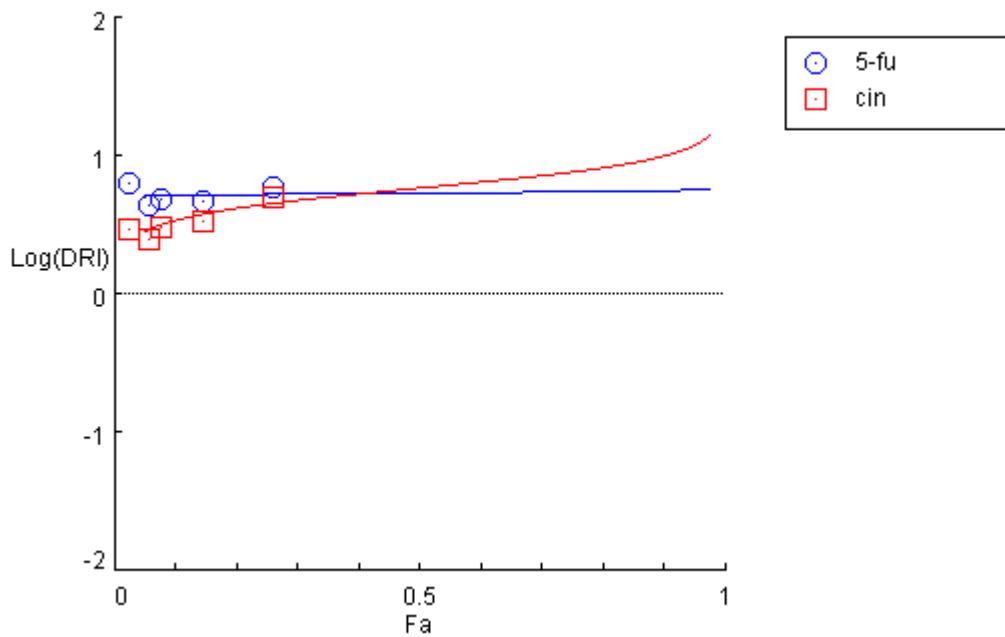

Isobologram for Combo: fu+cin (5-fu+cin [4.438:1])

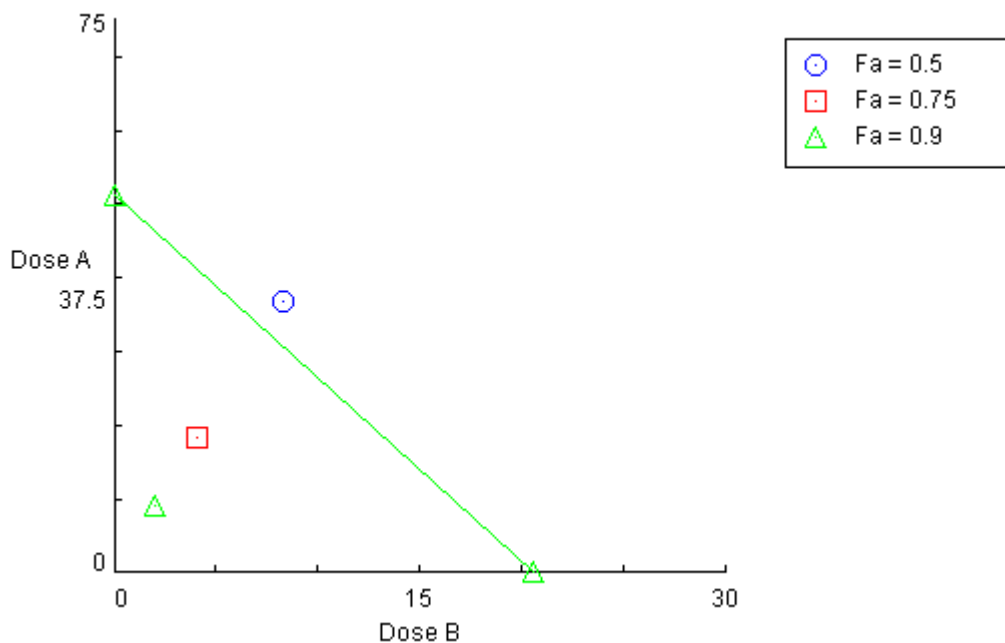

## Summary Table

**Experiment Name:** kh. nasirzadeh  
**Date:** 2017  
**File Name:** C:\Users\sng\Desktop\kh. nasirzadeh\analyzed\5-fuCin48h.cse  
**Description:** 5flurouracill + cinaropecrin on kyse30 cell line, after 48h treatment

analyzed by N. Goftari

**Drug:** 5-flurouracil (5-fu) [uM]

**Drug:** cinaropecrin (cin) [uM]

**Drug Combo:** 5-flurouracil + cinaropecrin (fu+cin) (5-fu+cin [4.438:1])

---

| <b>Drug/Combo</b> | <b>Dm</b> | <b>m</b> | <b>r</b> |
|-------------------|-----------|----------|----------|
| 5-fu              | 200.033   | -1.6108  | -0.9715  |
| cin               | 49.0440   | -2.5294  | -0.9716  |
| fu+cin            | 45.2679   | -1.5644  | -0.9664  |

---

CI values at:

| <b>Combo</b> | <b>ED50</b> | <b>ED75</b> | <b>ED90</b> | <b>ED95</b> |
|--------------|-------------|-------------|-------------|-------------|
| fu+cin       | 0.35442     | 0.31082     | 0.27668     | 0.25771     |

---

Data for Fa = 0.5

| <b>Drug/Combo</b> | <b>CI value</b> | <b>Dose 5-fu</b> | <b>Dose cin</b> |
|-------------------|-----------------|------------------|-----------------|
| 5-fu              |                 | 200.033          |                 |
| cin               |                 |                  | 49.0440         |
| fu+cin            | 0.35442         | 36.9435          | 8.32436         |

---

Data for Fa = 0.75

| <b>Drug/Combo</b> | <b>CI value</b> | <b>Dose 5-fu</b> | <b>Dose cin</b> |
|-------------------|-----------------|------------------|-----------------|
| 5-fu              |                 | 101.135          |                 |
| cin               |                 |                  | 31.7656         |
| fu+cin            | 0.31082         | 18.3041          | 4.12440         |

---

Data for Fa = 0.9

| <b>Drug/Combo</b> | <b>CI value</b> | <b>Dose 5-fu</b> | <b>Dose cin</b> |
|-------------------|-----------------|------------------|-----------------|
| 5-fu              |                 | 51.1330          |                 |
| cin               |                 |                  | 20.5745         |
| fu+cin            | 0.27668         | 9.06896          | 2.04348         |

---

Data for Fa = 0.95

| <b>Drug/Combo</b> | <b>CI value</b> | <b>Dose 5-fu</b> | <b>Dose cin</b> |
|-------------------|-----------------|------------------|-----------------|
| 5-fu              |                 | 32.1546          |                 |
| cin               |                 |                  | 15.3121         |
| fu+cin            | 0.25771         | 5.62497          | 1.26746         |

---

Data for Fa = 0.97

| <b>Drug/Combo</b> | <b>CI value</b> | <b>Dose 5-fu</b> | <b>Dose cin</b> |
|-------------------|-----------------|------------------|-----------------|
| 5-fu              |                 | 23.1154          |                 |
| cin               |                 |                  | 12.4094         |



| <b>Drug/Combo</b> | <b>CI value</b> | <b>Dose 5-fu</b> | <b>Dose cin</b> |
|-------------------|-----------------|------------------|-----------------|
| fu+cin            | 0.24594         | 4.00427          | 0.90227         |
